# Supplementary material for: Copeptin as a Predictor of Seizure Diagnosis and Seizure Type in Emergency Department Patients
Source: Research Square preprint supplement (doi:10.21203/rs.3.rs-8721177/v1), 2026-02-11
Supplement: Supplementary file 1 [file 4dc269870cd4f3f738d15228.docx]

**Table 1** Epidemiological and Clinical variables of participants

|  | **Seizure** | **FDS** |
| --- | --- | --- |
| **Age** (year) | 36.18± 18.92 | 41.43± 19.85 |
| **Gender** |  | |
| **Male** | 10 | 17 |
| **Female** | 14 | 18 |
| **Hospital arrival time** (n) |  | |
| <1 Hour | 14 | 17 |
| 1-2 Hour | 6 | 10 |
| >2 Hour | 4 | 8 |
| **Outcome** (n) |  | |
| Discharge | 22 | 28 |
| Inpatient admission | 1 | 6 |
| ICU admission | 1 | 1 |
| **Condition upon arrival at hospital** (n) |  | |
| Conscious | 22 | 31 |
| Postictal | 2 | 4 |
| **Incontinence** (n) |  | |
| None | 20 | 31 |
| Urine | 4 | 4 |
| **Associate trauma** (n) |  |  |
| Trauma present | 1 | 7 |
| No trauma | 23 | 28 |

**Table 2** Comparison of laboratory parameters according to presence of seizure

| Parameters | Patients with Seizure (n = 24) | Patients with FDS (n = 35) | p value |
| --- | --- | --- | --- |
| Age | 36.18± 18.92 | 41.43± 19.85 | 0.250 |
| Serum Glucose level (mg/dL) | 107.41± 25.42 | 95.38± 21.96 | **0.030** |
| Serum Ca level (mg/dL) | 9.24± 0. 68 | 9.07±0.72 | 0.330 |
| Serum Mg level (mg/dL) | 1.86± 0.22 | 1.86± 0.22 | 0.930 |
| Serum LDH Activity (U/L) | 235.48± 140.62 | 246.74± 102.17 | 0.200 |
| Serum Lactat Level (mmol/L) | 3.82± 2.75 | 2.73± 2.2 | 0.060 |
| pH | 7.35± 0.06 | 7.31± 0.33 | 0.470 |
| PCO2 (mmHg) | 39.45± 6.95 | 40.24± 8.3 | 0.670 |
| HCO3- (mmol/L) | 20.91± 3.24 | 22.24± 3.2 | 0.080 |
| Base deficite | -2.55± 4.03 | -0.74± 3 | **0.020** |
| Serum CRP Level (mg/L) | 5.30±4.09 | 1.48±0.72 | **p=0.001** |
| Serum IL-6 (pg/mL) | 11.99±6.07 | 2.24±0.77 | **p=0.001** |
| Serum Copeptin Level (pg/mL) | 498.62± 95.32 | 492.29± 81.23 | 0.750 |

**Table 3** CPT levels by seizure type

| Seizure Type | N | Mean | Minimum | Maximum |  | P value |
| --- | --- | --- | --- | --- | --- | --- |
|  |  |
| Absans | 2 | 661.77±15.45 | 650.84 | 672.70 |  | 0.80a  0.11b  0.16c |
| Focal | 10 | 512.86±76.38 | 427.93 | 664.22 |  | 0.80a  0.51d  0.70e |
| Generalized | 12 | 486.33±91.63 | 356.32 | 631.67 |  | 0.11b  0.51d  0.96f |
| FDS | 35 | 483.11±77.64 | 375.28 | 685.58 |  | 0.16c  0.70e  0.96f |
